# Supplementary material for: Exposure Levels of Airborne Fungi, Bacteria, and Antibiotic Resistance Genes in Cotton Farms during Cotton Harvesting and Evaluations of N95 Respirators against These Bioaerosols
Source: MDPI journal article supplement (doi:10.3390/microorganisms11061561), 2023-06-12
Supplement: s1 [file s1]

**Table S1.** Primer sets used in this study and their target ARGs and antibiotic classification

| Antibiotics          | ARG                        | Forward primer (5'-3')     | Reverse primer (5'-3')        | Reference |
|----------------------|----------------------------|----------------------------|-------------------------------|-----------|
| Aminoglycoside       | <i>aac(3)-IVa</i>          | CGTCGCCGAGCAACTTG          | CGGTACCTTGCCTCTCAAACC         | [54]      |
| $\beta$ -Lactams     | <i>bla<sub>TEM-1</sub></i> | TTGACGCCGGGCAAGA           | TGCTTTTCTGTGACTGGTGAGTACT     | [54]      |
|                      | <i>bla<sub>PSE-1</sub></i> | TTGTGACCTATTCCCCTGTAATAGAA | TGCGAAGCACGCATCATC            | [41]      |
| Chloramphenicol      | <i>flo</i>                 | ATTGTCTTCACGGTGTCCGTTA     | CCGCGATGTCGTCCGAAC            | [41]      |
| Glycopeptide         | <i>vanC</i>                | ACAGGGATTGGCTATGAACCAT     | TGACTGGCGATGATTTGACTATG       | [41]      |
| Macrolide            | <i>erm(B)</i>              | TAAAGGGCATTTAACGACGAAACT   | TTTATACCTCTGTTTGTTAGGGAATTGAA | [41]      |
| Phenicol             | <i>catIII</i>              | GCACTCGATGCCTTCCAAAA       | AGAGCCGATCCAAACGTCAT          | [41]      |
| Sulfonamide          | <i>sulI</i>                | CAGCGCTATGCGCTCAAG         | ATCCCGCTGCGCTGAGT             | [41]      |
| Tetracycline         | <i>tetA</i>                | CTCACCAGCCTGACCTCGAT       | CACGTTGTTATAGAAGCCGCATAG      | [54]      |
| Trimethoprim         | <i>dhfrI</i>               | GGAATGGCCCTGATATTCCA       | AGTCTTGCGTCCAACCAACAG         | [41]      |
| <u>Normalization</u> |                            |                            |                               |           |
| 16S rRNA             | -                          | GGGTTGCGCTCGTTGC           | ATGGYTGTCGTCAGCTCGTG          | [41]      |
